# Supplementary material for: Exploring the Profile Contributions in Meyerozyma guilliermondii YB4 under Different NaCl Concentrations Using GC-MS Combined with GC-IMS and an Electronic Nose
Source: MDPI journal article supplement (doi:10.3390/molecules28196979), 2023-10-08
Supplement: s1 [file s1]

**Table S1** The information of volatile compounds by GC-MS.

| Volatile compounds         | CAS        | Comparative content (%) |                        |                         |                        |                         |
|----------------------------|------------|-------------------------|------------------------|-------------------------|------------------------|-------------------------|
|                            |            | CK                      | APYA                   | APYB                    | APYC                   | APYD                    |
| (R)-(-)-2-HEXANOL          | 26549-24-6 | 2.76±0.60 <sup>a</sup>  | —                      | —                       | —                      | —                       |
| (S)-Propane-1,2-diol       | 4254-15-3  | 2.84±0.44 <sup>a</sup>  | —                      | —                       | —                      | —                       |
| Isopropyl alcohol          | 67-63-0    | 0.34±0.19 <sup>a</sup>  | 0.46±0.10 <sup>a</sup> | —                       | —                      | —                       |
| DL-2,3-Butanediol          | 6982-25-8  | 2.53±0.33 <sup>a</sup>  | —                      | 2.66±0.60 <sup>a</sup>  | —                      | 5.14±0.30 <sup>b</sup>  |
| cis-2-Thujen-4-ol          | 97631-68-0 | 0.64±0.26 <sup>a</sup>  | —                      | —                       | —                      | —                       |
| 2-Methyl-1-propanol        | 78-83-1    | 4.21±0.35 <sup>b</sup>  | 0.48±0.05 <sup>a</sup> | 4.99±0.90 <sup>b</sup>  | 5.91±0.22 <sup>b</sup> | —                       |
| 3-Methyl-1-butanol         | 123-51-3   | 0.43±0.13 <sup>a</sup>  | 6.43±0.82 <sup>b</sup> | —                       | 2.51±0.35 <sup>b</sup> | 2.63±0.30 <sup>b</sup>  |
| 2-Methyl-1-butanol         | 137-32-6   | 10.23±0.60 <sup>a</sup> | 6.81±0.70 <sup>b</sup> | 6.57±0.20 <sup>b</sup>  | 8.75±0.47 <sup>a</sup> | 10.07±0.68 <sup>a</sup> |
| Terpineol                  | 8000-41-7  | 1.18±0.48 <sup>a</sup>  | —                      | 4.11±0.92 <sup>b</sup>  | —                      | —                       |
| Ethanol                    | 64-17-5    | 22.55±1.22 <sup>a</sup> | 8.99±0.15 <sup>b</sup> | 7.79±0.55 <sup>bc</sup> | 7.39±0.56 <sup>c</sup> | 4.29±0.24 <sup>d</sup>  |
| (R)-(-)-1-Amino-2-propanol | 2799-16-8  | —                       | 0.61±0.13 <sup>a</sup> | —                       | —                      | —                       |
| 1-Pentanol                 | 71-41-0    | —                       | 6.43±0.64 <sup>a</sup> | 4.06±0.78 <sup>a</sup>  | 3.27±0.55 <sup>a</sup> | —                       |
| 1-Butanol                  | 71-36-3    | —                       | 1.54±0.15 <sup>a</sup> | —                       | —                      | —                       |
| 1-Hexanol                  | 111-27-3   | —                       | 0.33±0.03 <sup>a</sup> | —                       | —                      | —                       |
| Phenylethyl alcohol        | 60-12-8    | —                       | 1.67±0.25 <sup>a</sup> | —                       | 2.21±0.63 <sup>a</sup> | —                       |
| L-(+)-Isoleucinol          | 24629-25-2 | —                       | 1.05±0.69 <sup>a</sup> | —                       | —                      | —                       |
| 3-Methyl-2-Pentanol        | 565-60-6   | —                       | 3.00±0.63 <sup>a</sup> | —                       | —                      | —                       |
| 1-Propanol                 | 71-23-8    | —                       | 2.84±0.20 <sup>a</sup> | —                       | —                      | —                       |

**Table S1** (continued )

| Volatile compounds                 | CAS        | Comparative content (%) |                        |                        |                        |                        |
|------------------------------------|------------|-------------------------|------------------------|------------------------|------------------------|------------------------|
|                                    |            | CK                      | APYA                   | APYB                   | APYC                   | APYD                   |
| 2,4-Pentanediol                    | 625-69-4   | —                       | —                      | 1.02±0.21 <sup>a</sup> | —                      | —                      |
| D-Leucinol                         | 53448-09-2 | —                       | —                      | 1.66±0.51 <sup>a</sup> | —                      | —                      |
| Isopinocarveol                     | 6712-79-4  | —                       | —                      | 5.37±0.56 <sup>a</sup> | —                      | 3.57±0.34 <sup>b</sup> |
| 2,5-Dimethyl-benzenemethanol       | 53957-33-8 | —                       | —                      | 0.20±0.05 <sup>a</sup> | —                      | —                      |
| Eucalyptol                         | 470-82-6   | —                       | —                      | 0.61±0.81 <sup>a</sup> | —                      | 1.20±0.28 <sup>b</sup> |
| 3-Methyl-4-Penten-2-ol             | 1569-59-1  | —                       | —                      | —                      | 3.48±0.36 <sup>a</sup> | —                      |
| (R)-(-)-1,2-Propanediol            | 4254-14-2  | —                       | —                      | —                      | 0.74±0.20 <sup>a</sup> | —                      |
| Methyl-benzeneethanol              | 698-87-3   | —                       | —                      | —                      | —                      | 1.46±0.44 <sup>a</sup> |
| (R)-(-)-2-Amino-3-methyl-1-butanol | 4276-09-9  | —                       | —                      | —                      | —                      | 1.78±0.59 <sup>a</sup> |
| 1-Tetracosanol                     | 506-51-4   | —                       | —                      | —                      | —                      | 1.18±0.51 <sup>a</sup> |
| 1-(2-Methylphenyl)ethanol          | 7287-82-3  | —                       | —                      | —                      | —                      | 1.21±0.36 <sup>a</sup> |
| Nonanal                            | 124-19-6   | 2.18±0.68 <sup>b</sup>  | 5.00±0.50 <sup>a</sup> | 1.72±0.10 <sup>b</sup> | 2.10±0.07 <sup>b</sup> | 1.54±0.11 <sup>b</sup> |
| Methylglyoxal                      | 78-98-8    | 0.46±0.40 <sup>a</sup>  | —                      | 2.98±0.44 <sup>b</sup> | —                      | —                      |
| 2-Methyl-butanal                   | 96-17-3    | 0.66±0.27 <sup>a</sup>  | —                      | —                      | —                      | —                      |
| Methoxyacetaldehyde                | 10312-83-1 | —                       | 0.24±0.11 <sup>a</sup> | —                      | —                      | 0.14±0.02 <sup>b</sup> |
| Cuminaldehyde                      | 122-03-2   | —                       | 0.60±0.09 <sup>a</sup> | —                      | —                      | —                      |
| 5-Methylhexanal                    | 1860-39-5  | —                       | —                      | 0.26±0.03 <sup>a</sup> | —                      | —                      |
| Benzeneacetaldehyde                | 122-78-1   | —                       | —                      | 0.88±0.42 <sup>a</sup> | —                      | —                      |

**Table S1** (continued )

| Volatile compounds                                                 | CAS         | Comparative content (%) |                        |                         |                         |                        |
|--------------------------------------------------------------------|-------------|-------------------------|------------------------|-------------------------|-------------------------|------------------------|
|                                                                    |             | CK                      | APYA                   | APYB                    | APYC                    | APYD                   |
| Octanal                                                            | 124-13-0    | —                       | —                      | 3.66±0.29 <sup>a</sup>  | —                       | —                      |
| Benzaldehyde                                                       | 100-52-7    | —                       | —                      | —                       | 0.49±0.22 <sup>a</sup>  | —                      |
| 2-Methyl-3-phenylpropionaldehyde                                   | 5445-77-2   | —                       | —                      | —                       | 0.32±0.21 <sup>a</sup>  | —                      |
| 3-Hydroxy-2,2-dimethylpropanal                                     | 597-31-9    | —                       | —                      | —                       | —                       | 1.21±0.58 <sup>b</sup> |
| Methyltartronic acid                                               | 595-98-2    | 0.20±0.15 <sup>a</sup>  | 0.10±0.05 <sup>a</sup> | —                       | —                       | 0.32±0.13 <sup>a</sup> |
| α-Methyl-DL-valine                                                 | 26287-62-7  | 0.18±0.12 <sup>a</sup>  | —                      | —                       | —                       | —                      |
| 2,3-Dimethylpentanoic acid                                         | 82608-03-5  | —                       | 0.75±0.58 <sup>a</sup> | —                       | —                       | —                      |
| D-Alanine                                                          | 338-69-2    | —                       | —                      | 0.63±0.21 <sup>a</sup>  | —                       | —                      |
| Methoxyacetic acid                                                 | 625-45-6    | —                       | —                      | 0.59±0.12 <sup>a</sup>  | —                       | —                      |
| Hydroxyacetic acid                                                 | 79-14-1     | —                       | —                      | —                       | 0.14±0.05 <sup>a</sup>  | —                      |
| 4-Carboxycyclohexanone                                             | 874-61-3    | —                       | —                      | —                       | 2.08±0.23 <sup>a</sup>  | —                      |
| Ethyl propionate                                                   | 105-37-3    | 1.70±0.62 <sup>a</sup>  | 5.22±1.41 <sup>b</sup> | 2.67±1.20 <sup>a</sup>  | 5.30±1.13 <sup>b</sup>  | —                      |
| Ethyl butyrate                                                     | 105-54-4    | 2.48±0.25 <sup>b</sup>  | 0.48±0.12 <sup>a</sup> | 4.19±0.33 <sup>b</sup>  | —                       | —                      |
| Isopentyl formate                                                  | 110-45-2    | 0.78±0.26 <sup>a</sup>  | —                      | —                       | —                       | —                      |
| Ethyl Acetate                                                      | 141-78-6    | 2.61±0.36 <sup>d</sup>  | 8.58±0.53 <sup>b</sup> | 14.09±0.66 <sup>a</sup> | 15.36±0.34 <sup>a</sup> | 4.95±0.92 <sup>c</sup> |
| Pentanoic acid, 5-hydroxy-, 2,4-bis(1,1-dimethylethyl)phenyl ester | 166273-38-7 | 0.15±0.03 <sup>a</sup>  | —                      | —                       | —                       | —                      |
| Ethyl 8-bromooctanoate                                             | 29823-21-0  | 0.07±0.02 <sup>a</sup>  | —                      | —                       | —                       | —                      |
| Ethyl alaninate                                                    | 3082-75-5   | 1.26±0.44 <sup>a</sup>  | —                      | —                       | —                       | 6.21±0.75 <sup>b</sup> |

**Table S1** (continued )

| Volatile compounds                        | CAS        | Comparative content (%) |                        |                         |                         |                        |
|-------------------------------------------|------------|-------------------------|------------------------|-------------------------|-------------------------|------------------------|
|                                           |            | CK                      | APYA                   | APYB                    | APYC                    | APYD                   |
| Ethanedioic acid, MonoMethyl ester        | 600-23-7   | 2.59±1.27 <sup>a</sup>  | —                      | 5.94±0.42 <sup>a</sup>  | —                       | —                      |
| Ethyl isobutyrate                         | 97-62-1    | 0.04±0.00 <sup>a</sup>  | 0.96±1.41 <sup>b</sup> | —                       | 0.06±0.02 <sup>ab</sup> | —                      |
| Methyl formate                            | 107-31-3   | 1.65±0.92 <sup>a</sup>  | —                      | —                       | —                       | —                      |
| Butyl acrylate                            | 141-32-2   | 1.96±0.56 <sup>a</sup>  | 0.15±0.04 <sup>b</sup> | 0.39±0.44 <sup>b</sup>  | 0.45±0.37 <sup>b</sup>  | 3.26±0.25 <sup>a</sup> |
| Ethyl Hexanoate                           | 123-66-0   | —                       | 3.76±0.44 <sup>a</sup> | —                       | —                       | —                      |
| Isobutyl acetate                          | 110-19-0   | —                       | 0.11±0.02 <sup>a</sup> | 0.35±0.42 <sup>ab</sup> | 1.19±0.20 <sup>b</sup>  | —                      |
| Propyl propionate                         | 106-36-5   | —                       | 0.17±0.05 <sup>a</sup> | —                       | —                       | —                      |
| Ethyl 3-phenylpropionate                  | 2021-28-5  | —                       | 0.27±0.14 <sup>a</sup> | —                       | —                       | —                      |
| 2,2-Dimethyl-1,3-propanediol dinitrate    | 26482-65-5 | —                       | 0.64±0.34 <sup>a</sup> | —                       | —                       | —                      |
| Ethyl (2Z)-2-methoxyimino-3-oxo-butanoate | 60846-14-2 | —                       | 1.67±0.51 <sup>a</sup> | —                       | 1.38±0.35 <sup>a</sup>  | —                      |
| 2-Hydroxyethyl formate                    | 628-35-3   | —                       | 1.94±0.67 <sup>a</sup> | —                       | —                       | —                      |
| Isoamyl lactate                           | 19329-89-6 | —                       | 4.85±0.76 <sup>a</sup> | —                       | —                       | —                      |
| Isoamyl acetate                           | 123-92-2   | —                       | 5.74±0.07 <sup>a</sup> | —                       | —                       | —                      |
| Methyl 2-oxoacetate                       | 922-68-9   | —                       | 0.68±0.12 <sup>a</sup> | —                       | 4.90±0.51 <sup>b</sup>  | —                      |
| Ethyl nitrite                             | 109-95-5   | —                       | —                      | 1.96±0.27 <sup>a</sup>  | —                       | —                      |
| Amyl acetate                              | 628-63-7   | —                       | —                      | 3.33±0.86 <sup>a</sup>  | —                       | —                      |
| 2-Phenylethyl formate                     | 104-62-1   | —                       | —                      | —                       | 3.54±0.86 <sup>a</sup>  | 0.47±0.26 <sup>b</sup> |
| Ethyl 10-Bromodecanoate                   | 55099-31-5 | —                       | —                      | —                       | 3.29±0.65 <sup>a</sup>  | —                      |

**Table S1** (continued )

| Volatile compounds                        | CAS        | Comparative content (%) |                        |      |                        |                         |
|-------------------------------------------|------------|-------------------------|------------------------|------|------------------------|-------------------------|
|                                           |            | CK                      | APYA                   | APYB | APYC                   | APYD                    |
| Isocyanatomethane                         | 624-83-9   | —                       | —                      | —    | 2.37±0.48 <sup>a</sup> | —                       |
| Butyl formate                             | 592-84-7   | —                       | —                      | —    | 2.91±0.74 <sup>a</sup> | —                       |
| 1,2-Propanediol dinitrate                 | 6423-43-4  | —                       | —                      | —    | —                      | 4.33±0.64 <sup>a</sup>  |
| ethyl methyl(nitroso)carbamate            | 615-53-2   | —                       | —                      | —    | —                      | 2.17±0.25 <sup>a</sup>  |
| Palmitic acid ethyl ester                 | 628-97-7   | —                       | —                      | —    | —                      | 11.65±0.52 <sup>a</sup> |
| Xanthoxylin                               | 90-24-4    | 0.63±0.27 <sup>a</sup>  | —                      | —    | —                      | —                       |
| Piperonyl acetone                         | 55418-52-5 | —                       | 1.12±0.04 <sup>a</sup> | —    | —                      | —                       |
| 4'-Methylvalerophenone                    | 1671-77-8  | —                       | —                      | —    | 1.62±0.39 <sup>a</sup> | —                       |
| 4-Acetoxy-2-azetidinone                   | 28562-53-0 | —                       | —                      | —    | 1.91±0.26 <sup>a</sup> | —                       |
| Acetoin                                   | 513-86-0   | —                       | —                      | —    | 0.79±0.29 <sup>a</sup> | —                       |
| Methoxyacetone                            | 5878-19-3  | —                       | —                      | —    | 0.36±0.22 <sup>a</sup> | —                       |
| 4-Hydroxy-2-butanone                      | 590-90-9   | —                       | —                      | —    | 2.86±0.22 <sup>a</sup> | —                       |
| 2-Propanone,1-(1-methylethoxy)-           | 42781-12-4 | —                       | —                      | —    | —                      | 1.88±0.86 <sup>a</sup>  |
| (R)-1-methyl-5-(1-methylvinyl)cyclohexene | 1461-27-4  | 0.11±0.01 <sup>a</sup>  | 1.22±0.37 <sup>b</sup> | —    | —                      | —                       |
| Spiro[3.3]hepta-1,5-diene                 | 22635-78-5 | 0.04±0.03 <sup>a</sup>  | —                      | —    | —                      | —                       |
| (Z)-Anethole                              | 25679-28-1 | 1.47±0.78 <sup>a</sup>  | —                      | —    | 0.69±0.27 <sup>a</sup> | —                       |
| 4-Methoxybut-1-ene                        | 4696-30-4  | 0.80±0.12 <sup>a</sup>  | —                      | —    | —                      | —                       |
| Undecane,5-methylene-                     | 5698-48-6  | 0.10±0.04 <sup>a</sup>  | —                      | —    | —                      | —                       |

**Table S1** (continued )

| Volatile compounds                         | CAS        | Comparative content (%)      |                              |                              |                              |                              |
|--------------------------------------------|------------|------------------------------|------------------------------|------------------------------|------------------------------|------------------------------|
|                                            |            | CK                           | APYA                         | APYB                         | APYC                         | APYD                         |
| $\alpha$ -Terpinene                        | 99-86-5    | 2.43 $\pm$ 0.08 <sup>a</sup> | —                            | —                            | —                            | —                            |
| Terpinolene                                | 586-62-9   | 2.16 $\pm$ 0.32 <sup>a</sup> | —                            | —                            | —                            | —                            |
| 2-methyl-6-methylene-1,7-Octadiene         | 1686-30-2  | 1.22 $\pm$ 0.23 <sup>a</sup> | —                            | —                            | —                            | —                            |
| Ocimene                                    | 13877-91-3 | 2.18 $\pm$ 0.22 <sup>a</sup> | —                            | —                            | —                            | —                            |
| $\beta$ -Pinene                            | 127-91-3   | 2.58 $\pm$ 0.64 <sup>a</sup> | —                            | —                            | —                            | —                            |
| $\alpha$ -Phellandrene                     | 99-83-2    | 1.71 $\pm$ 0.30 <sup>a</sup> | —                            | —                            | —                            | 1.84 $\pm$ 0.15 <sup>a</sup> |
| Carene                                     | 13466-78-9 | 1.67 $\pm$ 0.06 <sup>a</sup> | —                            | 0.33 $\pm$ 0.24 <sup>a</sup> | —                            | —                            |
| Limonene                                   | 138-86-3   | 2.40 $\pm$ 0.74 <sup>a</sup> | —                            | 0.62 $\pm$ 0.34 <sup>a</sup> | —                            | —                            |
| $\alpha$ -Elemene                          | 33880-83-0 | 0.30 $\pm$ 0.00 <sup>a</sup> | —                            | —                            | —                            | —                            |
| 2,4-Dimethylstyrene                        | 2234-20-0  | 1.28 $\pm$ 0.20 <sup>a</sup> | —                            | —                            | —                            | —                            |
| (E)-5-Methyl-4-decene                      | 62338-51-6 | 0.17 $\pm$ 0.09 <sup>a</sup> | —                            | —                            | —                            | —                            |
| Anethole                                   | 104-46-1   | —                            | 1.82 $\pm$ 0.65 <sup>a</sup> | 0.54 $\pm$ 0.17 <sup>a</sup> | —                            | —                            |
| 7-Ethyl-1,3,5-cycloheptatriene             | 17634-51-4 | —                            | —                            | 0.02 $\pm$ 0.01 <sup>a</sup> | —                            | —                            |
| Cyclohexene, 1-methyl-5-(1-methylethenyl)- | 13898-73-2 | —                            | —                            | 0.70 $\pm$ 0.03 <sup>a</sup> | —                            | 1.07 $\pm$ 0.11 <sup>b</sup> |
| D-Limonene                                 | 5989-27-5  | —                            | —                            | —                            | 0.53 $\pm$ 0.21 <sup>a</sup> | —                            |
| (3E)-3-prop-2-enylidenecyclobutene         | 52097-85-5 | —                            | —                            | —                            | —                            | 2.21 $\pm$ 0.21 <sup>a</sup> |
| p-Cymene                                   | 99-87-6    | —                            | —                            | —                            | —                            | 0.20 $\pm$ 0.12 <sup>a</sup> |
| Trans-2,4-dimethyloxetane                  | 29424-94-0 | 0.60 $\pm$ 0.27 <sup>a</sup> | —                            | —                            | —                            | —                            |

**Table S1** (continued )

| Volatile compounds                                      | CAS         | Comparative content (%) |                        |                        |                        |                        |
|---------------------------------------------------------|-------------|-------------------------|------------------------|------------------------|------------------------|------------------------|
|                                                         |             | CK                      | APYA                   | APYB                   | APYC                   | APYD                   |
| 2,3-Epoxy-4,4-dimethylpentane                           | 53897-30-6  | 3.48±0.93 <sup>a</sup>  | —                      | 2.45±0.53 <sup>a</sup> | —                      | —                      |
| (2R,3R)-rel-Oxirane,2,3-bis(1-methylethyl)              | 54644-32-5  | 0.06±0.02 <sup>a</sup>  | —                      | —                      | —                      | —                      |
| 1,4-Bis(phenylmethyl)-2,3,5-trioxabicyclo[2.1.0]pentane | 56247-48-4  | —                       | —                      | 0.20±0.08 <sup>a</sup> | —                      | —                      |
| 3-Methoxyhexane                                         | 54658-01-4  | —                       | —                      | 1.22±0.09 <sup>a</sup> | —                      | —                      |
| 7-Hexylicosane                                          | 55333-99-8  | —                       | —                      | 2.17±0.37 <sup>a</sup> | —                      | —                      |
| 9-Hexylheptadecane                                      | 55124-79-3  | —                       | —                      | 0.92±0.14 <sup>a</sup> | —                      | —                      |
| Decane                                                  | 124-18-5    | —                       | —                      | —                      | 0.60±0.33 <sup>a</sup> | —                      |
| 2-Butene oxide                                          | 3266-23-7   | —                       | —                      | —                      | 1.93±0.58 <sup>a</sup> | —                      |
| 2,3,5-Trimethyldecane                                   | 62238-11-3  | —                       | —                      | —                      | 0.85±0.18 <sup>a</sup> | —                      |
| 1,3-diphenylpropane                                     | 1081-75-0   | —                       | —                      | —                      | —                      | 0.44±0.25 <sup>a</sup> |
| sec-Butylamine                                          | 13952-84-6  | —                       | —                      | —                      | —                      | 0.76±0.32 <sup>a</sup> |
| Decane                                                  | 124-18-5    | —                       | —                      | —                      | —                      | 2.17±0.54 <sup>a</sup> |
| Tetratriacontane                                        | 14167-59-0  | —                       | —                      | —                      | —                      | 3.98±0.25 <sup>a</sup> |
| 1,54-dibromo-Tetrapentacontane                          | 852228-22-9 | —                       | —                      | —                      | —                      | 2.17±0.13 <sup>a</sup> |
| Tetracosane                                             | 646-31-1    | —                       | —                      | —                      | —                      | 1.35±0.35 <sup>a</sup> |
| 3-Methyl-3-phenyl-azetidine                             | 5961-33-1   | —                       | —                      | —                      | —                      | 0.26±0.18 <sup>a</sup> |
| 2,4-Di-tert-butylphenol                                 | 96-76-4     | —                       | 0.69±0.23 <sup>a</sup> | 0.58±0.44 <sup>a</sup> | 1.08±0.15 <sup>a</sup> | 2.43±0.55 <sup>a</sup> |
| 2,6-Di-tert-butylphenol                                 | 128-39-2    | —                       | —                      | —                      | 0.22±0.11 <sup>a</sup> | —                      |

**Table S1** (continued )

| Volatile compounds            | CAS        | Comparative content (%) |                        |                        |                        |                        |
|-------------------------------|------------|-------------------------|------------------------|------------------------|------------------------|------------------------|
|                               |            | CK                      | APYA                   | APYB                   | APYC                   | APYD                   |
| Estragole                     | 140-67-0   | 0.51±0.15 <sup>a</sup>  | —                      | —                      | 1.16±0.19 <sup>a</sup> | 2.35±0.47 <sup>a</sup> |
| 2-Methoxyethanol              | 109-86-4   | —                       | 5.49±0.71 <sup>a</sup> | —                      | —                      | 0.32±0.24 <sup>a</sup> |
| N-butyl methyl ether          | 628-28-4   | —                       | —                      | 0.28±0.21 <sup>a</sup> | —                      | —                      |
| Ethyl methyl ether            | 540-67-0   | —                       | —                      | 1.71±0.33 <sup>a</sup> | —                      | —                      |
| 2-Butoxyethanol               | 111-76-2   | 0.15±0.05 <sup>a</sup>  | —                      | 0.26±0.16 <sup>a</sup> | —                      | 0.97±0.13 <sup>a</sup> |
| Dimethyl ether                | 115-10-6   | —                       | —                      | —                      | —                      | 0.09±0.04 <sup>a</sup> |
| 2-Ethoxyethylamine            | 110-76-9   | 0.14±0.07 <sup>c</sup>  | 0.02±0.01 <sup>a</sup> | —                      | 0.63±0.21 <sup>c</sup> | 0.75±0.16 <sup>c</sup> |
| Carbon dioxide                | 124-38-9   | 1.59±0.44 <sup>b</sup>  | 2.00±1.05 <sup>b</sup> | —                      | —                      | 2.49±0.89 <sup>b</sup> |
| 1-Ethyl-2,4-dimethyl-Benzene  | 874-41-9   | 0.51±0.25 <sup>b</sup>  | —                      | —                      | —                      | 0.17±0.10 <sup>b</sup> |
| Nitrogen dioxide              | 10102-44-0 | 2.88±0.64 <sup>b</sup>  | 2.63±0.29 <sup>b</sup> | 0.63±0.33 <sup>b</sup> | —                      | —                      |
| Di-tert-butyl peroxide        | 110-05-4   | 1.33±0.21 <sup>c</sup>  | —                      | 1.27±0.18 <sup>c</sup> | —                      | 0.11±0.03 <sup>b</sup> |
| N-PropylBenzene               | 103-65-1   | —                       | 0.37±0.18 <sup>a</sup> | —                      | 0.35±0.27 <sup>a</sup> | —                      |
| 2,5-Dimethylfuran             | 625-86-5   | —                       | 0.33±0.25 <sup>a</sup> | —                      | —                      | —                      |
| 2-Phenylethylamine            | 64-04-0    | —                       | 0.04±0.02 <sup>a</sup> | —                      | —                      | —                      |
| Tetramethylene diisocyanate   | 4538-37-8  | —                       | 0.06±0.01 <sup>a</sup> | —                      | —                      | —                      |
| (Methoxymethoxymethyl)benzene | 31600-55-2 | —                       | —                      | 0.16±0.09 <sup>a</sup> | —                      | —                      |
| 2-Hexanamine                  | 5329-79-3  | —                       | —                      | 0.06±0.03 <sup>a</sup> | —                      | —                      |
| 5-Amino-1,3-diphenyl-Pyrazole | 5356-71-8  | —                       | —                      | 0.29±0.17 <sup>a</sup> | —                      | —                      |



**Table S1** (continued )

| Volatile compounds         | CAS         | Comparative contant (%) |      |      |                        |                        |
|----------------------------|-------------|-------------------------|------|------|------------------------|------------------------|
|                            |             | CK                      | APYA | APYB | APYC                   | APYD                   |
| Urea                       | 57-13-6     | —                       | —    | —    | 1.08±0.16 <sup>a</sup> | —                      |
| Ammonium acetate           | 631-61-8    | —                       | —    | —    | 0.09±0.02 <sup>a</sup> | —                      |
| Oxiranemethanol, 2-phenyl- | 141248-89-7 | —                       | —    | —    | —                      | 0.03±0.02 <sup>a</sup> |

The term “—” means the compound was not detected in sample; Different letters in the same column indicated significant differences ( p < 0.05).

**Table S2** The information of volatile compounds by GC-IMS

| Volatile Compounds                     | CAS        | RI     | RT       | DT      | Comparative content (%) |                         |                         |                         |                         |
|----------------------------------------|------------|--------|----------|---------|-------------------------|-------------------------|-------------------------|-------------------------|-------------------------|
|                                        |            |        |          |         | CK                      | APYA                    | APYB                    | APYC                    | APYD                    |
| 2-ethyl-1-hexanol                      | 104-76-7   | 1028.7 | 391.882  | 1.38717 | 6.21±0.19 <sup>b</sup>  | 7.15±0.12 <sup>a</sup>  | 7.59±0.04 <sup>a</sup>  | 7.18±0.37 <sup>a</sup>  | 7.52±0.21 <sup>a</sup>  |
| 2-methyl-1-propanol-M                  | 78-83-1    | 1073.5 | 475.509  | 1.17871 | 0.77±0.01 <sup>a</sup>  | 0.59±0.01 <sup>b</sup>  | 0.51±0.01 <sup>c</sup>  | 0.52±0.01 <sup>c</sup>  | 0.59±0.02 <sup>b</sup>  |
| 1-Propanol                             | 71-23-8    | 1031.7 | 397.4    | 1.25042 | 0.37±0.01 <sup>c</sup>  | 0.45±0.02 <sup>b</sup>  | 0.49±0.01 <sup>ab</sup> | 0.52±0.02 <sup>a</sup>  | 0.50±0.02 <sup>a</sup>  |
| 2-furanmethanol                        | 98-00-0    | 888.5  | 239.797  | 1.13529 | 0.17±0.00 <sup>a</sup>  | 0.11±0.01 <sup>b</sup>  | 0.10±0.00 <sup>b</sup>  | 0.10±0.01 <sup>b</sup>  | 0.12±0.01 <sup>b</sup>  |
| 2-Hexen-1-ol                           | 2305-21-7  | 863.8  | 225.608  | 1.2015  | 0.07±0.00 <sup>b</sup>  | 0.06±0.00 <sup>c</sup>  | 0.07±0.00 <sup>b</sup>  | 0.07±0.00 <sup>b</sup>  | 0.10±0.00 <sup>a</sup>  |
| 2-Methyl propanol-D                    | 78-83-1    | 1073.7 | 475.833  | 1.38399 | 0.14±0.01 <sup>c</sup>  | 0.49±0.01 <sup>b</sup>  | 0.52±0.01 <sup>b</sup>  | 0.67±0.01 <sup>a</sup>  | 0.52±0.03 <sup>b</sup>  |
| (Z)3-Octen-1-ol-M                      | 20125-84-2 | 1054   | 439.106  | 1.30605 | 0.04±0.00 <sup>e</sup>  | 0.16±0.00 <sup>d</sup>  | 0.22±0.00 <sup>c</sup>  | 0.29±0.01 <sup>a</sup>  | 0.26±0.01 <sup>b</sup>  |
| (Z)3-Octen-1-ol-D                      | 20125-84-2 | 1053.3 | 437.679  | 1.75153 | 0.04±0.01 <sup>d</sup>  | 0.09±0.01 <sup>c</sup>  | 0.27±0.01 <sup>b</sup>  | 0.58±0.02 <sup>a</sup>  | 0.30±0.01 <sup>b</sup>  |
| (Z)-4-heptenal                         | 6728-31-0  | 883.7  | 237.029  | 1.59176 | 0.05±0.00 <sup>a</sup>  | 0.04±0.00 <sup>a</sup>  | 0.05±0.00 <sup>a</sup>  | 0.05±0.01 <sup>a</sup>  | 0.04±0.00 <sup>a</sup>  |
| Ethanol                                | 64-17-5    | 970.6  | 309.552  | 1.03854 | 8.86±0.12 <sup>a</sup>  | 2.51±0.09 <sup>b</sup>  | 2.12±0.05 <sup>c</sup>  | 1.90±0.07 <sup>d</sup>  | 2.48±0.04 <sup>b</sup>  |
| 3-(methylsulfanyl)propanol (methionol) | 505-10-2   | 978.8  | 316.57   | 1.47376 | 0.02±0.00 <sup>e</sup>  | 0.04±0.00 <sup>c</sup>  | 0.06±0.00 <sup>a</sup>  | 0.05±0.00 <sup>b</sup>  | 0.04±0.00 <sup>d</sup>  |
| 2-propanol                             | 67-63-0    | 891.5  | 241.535  | 1.09787 | 0.44±0.01 <sup>a</sup>  | 0.11±0.01 <sup>c</sup>  | 0.11±0.00 <sup>c</sup>  | 0.11±0.01 <sup>c</sup>  | 0.14±0.00 <sup>b</sup>  |
| Butan-2-ol                             | 78-92-2    | 1026.7 | 388.222  | 1.17329 | 0.48±0.01 <sup>a</sup>  | 0.16±0.01 <sup>b</sup>  | 0.13±0.00 <sup>cd</sup> | 0.12±0.01 <sup>d</sup>  | 0.15±0.01 <sup>bc</sup> |
| (E,E)-2,4-Hexadienal                   | 142-83-6   | 1410.9 | 1104.574 | 1.11275 | 0.14±0.01 <sup>b</sup>  | 0.21±0.00 <sup>a</sup>  | 0.05±0.00 <sup>c</sup>  | 0.04±0.00 <sup>c</sup>  | 0.04±0.00 <sup>c</sup>  |
| 2-Methyl-2-pentenal                    | 623-36-9   | 1149.4 | 616.988  | 1.50178 | 7.01±0.25 <sup>e</sup>  | 13.92±0.13 <sup>d</sup> | 15.75±0.04 <sup>c</sup> | 16.29±0.11 <sup>b</sup> | 16.79±0.11 <sup>a</sup> |
| Heptanal                               | 111-71-7   | 1159.1 | 634.992  | 1.32241 | 0.51±0.02 <sup>b</sup>  | 1.07±0.04 <sup>a</sup>  | 1.05±0.03 <sup>a</sup>  | 1.00±0.01 <sup>a</sup>  | 1.05±0.02 <sup>a</sup>  |
| Hexanal                                | 66-25-1    | 1072.6 | 473.717  | 1.26055 | 0.20±0.01 <sup>d</sup>  | 0.70±0.02 <sup>c</sup>  | 0.77±0.00 <sup>b</sup>  | 0.80±0.00 <sup>a</sup>  | 0.76±0.01 <sup>b</sup>  |

**Table S2** (continued )

| Volatile Compounds              | CAS       | RI     | RT      | DT      | Comparative content (%) |                         |                         |                         |                         |
|---------------------------------|-----------|--------|---------|---------|-------------------------|-------------------------|-------------------------|-------------------------|-------------------------|
|                                 |           |        |         |         | CK                      | APYA                    | APYB                    | APYC                    | APYD                    |
| Pentanal                        | 110-62-3  | 984.3  | 321.321 | 1.19327 | 0.24±0.04 <sup>a</sup>  | 0.08±0.00 <sup>b</sup>  | 0.08±0.01 <sup>b</sup>  | 0.10±0.05 <sup>b</sup>  | 0.10±0.02 <sup>b</sup>  |
| (E)-2-hexenal                   | 6728-26-3 | 852.3  | 219.004 | 1.19935 | 0.22±0.01 <sup>a</sup>  | 0.16±0.01 <sup>b</sup>  | 0.22±0.01 <sup>a</sup>  | 0.18±0.03 <sup>ab</sup> | 0.22±0.01 <sup>a</sup>  |
| Butanal                         | 123-72-8  | 850.6  | 217.986 | 1.27854 | 0.20±0.01 <sup>b</sup>  | 0.14±0.01 <sup>c</sup>  | 0.21±0.01 <sup>b</sup>  | 0.14±0.03 <sup>c</sup>  | 0.27±0.02 <sup>a</sup>  |
| Octanal                         | 124-13-0  | 999.1  | 336.711 | 1.39011 | 0.08±0.01 <sup>d</sup>  | 0.27±0.01 <sup>c</sup>  | 0.37±0.01 <sup>b</sup>  | 0.68±0.05 <sup>a</sup>  | 0.66±0.01 <sup>a</sup>  |
| acrolein                        | 107-02-8  | 875.3  | 232.182 | 1.0003  | 6.28±0.09 <sup>a</sup>  | 3.66±0.25 <sup>b</sup>  | 3.35±0.08 <sup>bc</sup> | 3.10±0.25 <sup>c</sup>  | 3.20±0.05 <sup>c</sup>  |
| isobutyl butyrate               | 539-90-2  | 1148.5 | 615.236 | 1.78982 | 0.10±0.01 <sup>d</sup>  | 0.39±0.02 <sup>c</sup>  | 0.47±0.01 <sup>b</sup>  | 0.52±0.01 <sup>a</sup>  | 0.48±0.02 <sup>b</sup>  |
| Butyl acetate                   | 123-86-4  | 1114.9 | 552.66  | 1.25645 | 0.30±0.02 <sup>a</sup>  | 0.10±0.00 <sup>b</sup>  | 0.10±0.00 <sup>b</sup>  | 0.10±0.00 <sup>b</sup>  | 0.10±0.01 <sup>b</sup>  |
| Isoamyl acetate                 | 123-92-2  | 1141.4 | 602.104 | 1.31224 | 0.29±0.00 <sup>c</sup>  | 0.55±0.01 <sup>b</sup>  | 0.58±0.02 <sup>a</sup>  | 0.56±0.01 <sup>ab</sup> | 0.56±0.00 <sup>ab</sup> |
| ethyl valerate                  | 539-82-2  | 1142.3 | 603.638 | 1.2386  | 1.45±0.04 <sup>a</sup>  | 0.67±0.02 <sup>b</sup>  | 0.48±0.01 <sup>cd</sup> | 0.42±0.04 <sup>d</sup>  | 0.53±0.03 <sup>c</sup>  |
| Isovaleric acid, isobutyl ester | 589-59-3  | 1007.7 | 352.761 | 1.89185 | 0.45±0.05 <sup>a</sup>  | 0.38±0.03 <sup>a</sup>  | 0.40±0.01 <sup>a</sup>  | 0.38±0.09 <sup>a</sup>  | 0.42±0.04 <sup>a</sup>  |
| methyl hexanoate                | 106-70-7  | 907.5  | 255.118 | 1.6846  | 4.37±0.06 <sup>a</sup>  | 2.34±0.04 <sup>bc</sup> | 2.10±0.15 <sup>c</sup>  | 2.22±0.32 <sup>c</sup>  | 2.70±0.15 <sup>b</sup>  |
| Ethyl 2-methylbutanoate         | 7452-79-1 | 1026.3 | 387.39  | 1.2542  | 0.21±0.01 <sup>b</sup>  | 0.28±0.01 <sup>a</sup>  | 0.25±0.00 <sup>a</sup>  | 0.25±0.02 <sup>a</sup>  | 0.27±0.01 <sup>a</sup>  |
| Ethyl acetate                   | 141-78-6  | 895.1  | 244.386 | 1.33695 | 2.26±0.07 <sup>c</sup>  | 5.16±0.03 <sup>a</sup>  | 5.34±0.08 <sup>a</sup>  | 5.14±0.16 <sup>a</sup>  | 4.83±0.03 <sup>b</sup>  |
| Methyl heptanoate               | 106-73-0  | 1007.1 | 351.531 | 1.80383 | 2.98±0.33 <sup>a</sup>  | 2.81±0.19 <sup>a</sup>  | 3.26±0.15 <sup>a</sup>  | 3.34±0.87 <sup>a</sup>  | 3.73±0.43 <sup>a</sup>  |
| Ethyl formate                   | 109-94-4  | 841.7  | 212.871 | 1.06962 | 1.00±0.04 <sup>a</sup>  | 0.82±0.06 <sup>b</sup>  | 0.79±0.01 <sup>bc</sup> | 0.74±0.01 <sup>c</sup>  | 0.79±0.01 <sup>b</sup>  |
| Bornylacetate                   | 76-49-3   | 1282.1 | 864.456 | 1.23675 | 1.43±0.02 <sup>a</sup>  | 1.00±0.05 <sup>b</sup>  | 0.53±0.03 <sup>c</sup>  | 0.52±0.01 <sup>c</sup>  | 0.55±0.02 <sup>c</sup>  |
| Ethyl isobutanoate              | 97-62-1   | 940.9  | 283.877 | 1.56482 | 0.15±0.00 <sup>c</sup>  | 0.38±0.02 <sup>d</sup>  | 1.99±0.05 <sup>a</sup>  | 1.59±0.13 <sup>b</sup>  | 0.65±0.03 <sup>c</sup>  |
| Methyl acrylate                 | 96-33-3   | 934.9  | 278.749 | 1.26771 | 0.07±0.01 <sup>c</sup>  | 0.19±0.00 <sup>b</sup>  | 0.27±0.00 <sup>a</sup>  | 0.27±0.01 <sup>a</sup>  | 0.27±0.00 <sup>a</sup>  |

**Table S2** (continued )

| Volatile Compounds              | CAS        | RI     | RT      | DT      | Comparative content (%) |                        |                         |                         |                        |
|---------------------------------|------------|--------|---------|---------|-------------------------|------------------------|-------------------------|-------------------------|------------------------|
|                                 |            |        |         |         | CK                      | APYA                   | APYB                    | APYC                    | APYD                   |
| 5-ethylidihydro-2(3h)-furanone  | 695-06-7   | 1052.9 | 437.007 | 1.53814 | 0.04±0.00 <sup>d</sup>  | 0.09±0.00 <sup>c</sup> | 0.17±0.01 <sup>b</sup>  | 0.21±0.00 <sup>a</sup>  | 0.17±0.01 <sup>b</sup> |
| Isoamyl butyrate                | 106-27-4   | 1053.3 | 437.77  | 1.40915 | 0.03±0.01 <sup>d</sup>  | 0.18±0.01 <sup>c</sup> | 0.30±0.01 <sup>b</sup>  | 0.41±0.00 <sup>a</sup>  | 0.30±0.00 <sup>b</sup> |
| Methyl 3-(methylthio)propanoate | 13532-18-8 | 1029.5 | 393.383 | 1.60547 | 0.10±0.00 <sup>c</sup>  | 0.11±0.01 <sup>b</sup> | 0.13±0.00 <sup>a</sup>  | 0.13±0.01 <sup>ab</sup> | 0.11±0.00 <sup>b</sup> |
| Ethyl propanoate                | 105-37-3   | 934.5  | 278.377 | 1.458   | 0.03±0.00 <sup>c</sup>  | 0.12±0.00 <sup>d</sup> | 0.65±0.01 <sup>b</sup>  | 0.72±0.05 <sup>a</sup>  | 0.38±0.01 <sup>c</sup> |
| Isobutyl formate                | 542-55-2   | 937    | 280.559 | 1.50946 | 0.03±0.00 <sup>d</sup>  | 0.09±0.01 <sup>c</sup> | 0.41±0.01 <sup>a</sup>  | 0.39±0.03 <sup>a</sup>  | 0.20±0.00 <sup>b</sup> |
| Propyl acetate                  | 109-60-4   | 947.4  | 289.49  | 1.47999 | 0.01±0.00 <sup>d</sup>  | 0.08±0.01 <sup>a</sup> | 0.05±0.00 <sup>b</sup>  | 0.07±0.01 <sup>ab</sup> | 0.03±0.00 <sup>c</sup> |
| Methyl butanoate                | 623-42-7   | 998.7  | 335.89  | 1.43251 | 0.02±0.00 <sup>d</sup>  | 0.05±0.00 <sup>b</sup> | 0.05±0.00 <sup>a</sup>  | 0.05±0.00 <sup>b</sup>  | 0.04±0.00 <sup>c</sup> |
| Amyl acetate                    | 628-63-7   | 912.2  | 259.136 | 1.33657 | 0.27±0.01 <sup>a</sup>  | 0.24±0.01 <sup>a</sup> | 0.28±0.02 <sup>a</sup>  | 0.24±0.05 <sup>a</sup>  | 0.22±0.01 <sup>a</sup> |
| Ethyl lactate                   | 97-64-3    | 814    | 196.986 | 1.13274 | 0.27±0.01 <sup>c</sup>  | 0.54±0.01 <sup>b</sup> | 0.62±0.00 <sup>a</sup>  | 0.57±0.01 <sup>b</sup>  | 0.61±0.02 <sup>a</sup> |
| Iso-Propyl acetate              | 108-21-4   | 862.4  | 224.785 | 1.1557  | 0.02±0.00 <sup>c</sup>  | 0.12±0.00 <sup>a</sup> | 0.12±0.00 <sup>a</sup>  | 0.13±0.01 <sup>a</sup>  | 0.08±0.00 <sup>b</sup> |
| Ethyl 2-methylpentanoate        | 39255-32-8 | 941.3  | 284.266 | 1.31773 | 0.18±0.00 <sup>d</sup>  | 0.31±0.00 <sup>c</sup> | 0.43±0.01 <sup>a</sup>  | 0.42±0.00 <sup>a</sup>  | 0.37±0.01 <sup>b</sup> |
| (Z)-3-Hexenyl propionate        | 33467-74-2 | 1113.1 | 549.33  | 1.36241 | 0.09±0.00 <sup>a</sup>  | 0.06±0.00 <sup>b</sup> | 0.03±0.00 <sup>c</sup>  | 0.03±0.00 <sup>c</sup>  | 0.03±0.00 <sup>c</sup> |
| Ethyl 3-hydroxyhexanoate        | 2305-25-1  | 1128.8 | 578.513 | 1.30313 | 0.18±0.00 <sup>a</sup>  | 0.07±0.00 <sup>b</sup> | 0.07±0.00 <sup>b</sup>  | 0.07±0.02 <sup>b</sup>  | 0.08±0.01 <sup>b</sup> |
| Ethyl isovalerate               | 108-64-5   | 850.2  | 217.795 | 1.67356 | 0.13±0.03 <sup>ab</sup> | 0.08±0.01 <sup>b</sup> | 0.10±0.01 <sup>b</sup>  | 0.11±0.03 <sup>ab</sup> | 0.18±0.02 <sup>a</sup> |
| 2-Methylbutanoic acid           | 116-53-0   | 846.1  | 215.416 | 1.47197 | 0.82±0.14 <sup>a</sup>  | 0.60±0.03 <sup>a</sup> | 0.52±0.06 <sup>a</sup>  | 0.65±0.23 <sup>a</sup>  | 0.74±0.09 <sup>a</sup> |
| Prop-1-ene-3,3'-thiobis         | 592-88-1   | 857.2  | 221.814 | 1.11416 | 4.04±0.11 <sup>a</sup>  | 2.92±0.02 <sup>b</sup> | 2.61±0.05 <sup>c</sup>  | 2.21±0.09 <sup>d</sup>  | 2.52±0.01 <sup>c</sup> |
| o-Cresol                        | 95-48-7    | 1061.9 | 453.779 | 1.13528 | 0.62±0.02 <sup>d</sup>  | 2.32±0.06 <sup>c</sup> | 2.66±0.08 <sup>ab</sup> | 2.74±0.03 <sup>a</sup>  | 2.55±0.06 <sup>b</sup> |
| 2,6-dimethylphenol              | 576-26-1   | 1103.2 | 530.897 | 1.13423 | 1.47±0.08 <sup>d</sup>  | 5.56±0.16 <sup>c</sup> | 6.76±0.18 <sup>b</sup>  | 7.38±0.23 <sup>a</sup>  | 6.45±0.07 <sup>b</sup> |

**Table S2** (continued )

| Volatile Compounds           | CAS        | RI     | RT      | DT      | Comparative content (%) |                         |                         |                         |                         |
|------------------------------|------------|--------|---------|---------|-------------------------|-------------------------|-------------------------|-------------------------|-------------------------|
|                              |            |        |         |         | CK                      | APYA                    | APYB                    | APYC                    | APYD                    |
| Octan-2-one                  | 111-13-7   | 1282.6 | 865.388 | 1.33588 | 23.14±0.22 <sup>a</sup> | 16.23±0.18 <sup>b</sup> | 9.18±0.26 <sup>d</sup>  | 9.50±0.22 <sup>d</sup>  | 10.11±0.25 <sup>c</sup> |
| Acetoin                      | 513-86-0   | 1273.1 | 847.64  | 1.06799 | 1.40±0.01 <sup>a</sup>  | 0.71±0.01 <sup>b</sup>  | 0.58±0.01 <sup>d</sup>  | 0.56±0.01 <sup>d</sup>  | 0.65±0.01 <sup>c</sup>  |
| MIBK                         | 108-10-1   | 1032.6 | 399.137 | 1.17    | 1.43±0.01 <sup>a</sup>  | 0.71±0.02 <sup>bc</sup> | 0.67±0.01 <sup>c</sup>  | 0.62±0.02 <sup>d</sup>  | 0.73±0.02 <sup>b</sup>  |
| Butan-2-one                  | 78-93-3    | 953    | 294.295 | 1.23543 | 0.31±0.02 <sup>a</sup>  | 0.20±0.00 <sup>d</sup>  | 0.22±0.00 <sup>cd</sup> | 0.22±0.01 <sup>c</sup>  | 0.25±0.00 <sup>b</sup>  |
| Acetone                      | 67-64-1    | 842.5  | 213.362 | 1.14547 | 0.65±0.03 <sup>c</sup>  | 0.82±0.04 <sup>a</sup>  | 0.78±0.03 <sup>ab</sup> | 0.72±0.05 <sup>bc</sup> | 0.64±0.03 <sup>c</sup>  |
| Pentan-2-one                 | 107-87-9   | 1002.8 | 343.621 | 1.1188  | 1.00±0.01 <sup>a</sup>  | 0.82±0.01 <sup>b</sup>  | 0.79±0.01 <sup>b</sup>  | 0.74±0.03 <sup>c</sup>  | 0.79±0.00 <sup>b</sup>  |
| 3-Pentanone                  | 96-22-0    | 976.2  | 314.311 | 1.34025 | 0.06±0.01 <sup>d</sup>  | 0.39±0.01 <sup>c</sup>  | 0.48±0.01 <sup>a</sup>  | 0.43±0.02 <sup>b</sup>  | 0.35±0.01 <sup>c</sup>  |
| 2-Cyclohexen-1-one           | 930-68-7   | 935.3  | 279.089 | 1.39625 | 0.02±0.00 <sup>d</sup>  | 0.05±0.00 <sup>c</sup>  | 0.12±0.00 <sup>a</sup>  | 0.12±0.00 <sup>a</sup>  | 0.07±0.00 <sup>b</sup>  |
| 2-Heptanone                  | 110-43-0   | 898.9  | 247.661 | 1.63906 | 0.31±0.01 <sup>a</sup>  | 0.06±0.00 <sup>c</sup>  | 0.06±0.01 <sup>c</sup>  | 0.06±0.01 <sup>c</sup>  | 0.09±0.01 <sup>b</sup>  |
| d-Camphor                    | 464-49-3   | 1127.8 | 576.683 | 1.34695 | 0.10±0.00 <sup>a</sup>  | 0.10±0.00 <sup>a</sup>  | 0.11±0.01 <sup>a</sup>  | 0.12±0.02 <sup>a</sup>  | 0.11±0.01 <sup>a</sup>  |
| Styrene                      | 10042-5    | 1293.3 | 885.253 | 1.07016 | 3.69±0.12 <sup>a</sup>  | 1.92±0.04 <sup>b</sup>  | 1.48±0.05 <sup>c</sup>  | 1.34±0.05 <sup>c</sup>  | 1.50±0.01 <sup>c</sup>  |
| Limonene                     | 138-86-3   | 1197.6 | 706.903 | 1.21548 | 0.13±0.00 <sup>a</sup>  | 0.08±0.01 <sup>b</sup>  | 0.09±0.00 <sup>b</sup>  | 0.09±0.02 <sup>b</sup>  | 0.10±0.02 <sup>ab</sup> |
| $\beta$ -pinene              | 127-91-3   | 1128   | 576.989 | 1.21578 | 0.32±0.00 <sup>a</sup>  | 0.19±0.01 <sup>b</sup>  | 0.17±0.01 <sup>b</sup>  | 0.18±0.06 <sup>b</sup>  | 0.17±0.02 <sup>b</sup>  |
| $\alpha$ -pinene             | 80-56-8    | 998.6  | 335.669 | 1.26391 | 2.66±0.01 <sup>d</sup>  | 3.62±0.03 <sup>a</sup>  | 3.55±0.04 <sup>a</sup>  | 3.19±0.06 <sup>b</sup>  | 2.96±0.03 <sup>c</sup>  |
| $\beta$ -myrcene             | 123-35-3   | 977.3  | 315.265 | 1.61372 | 0.02±0.00 <sup>d</sup>  | 0.35±0.03 <sup>b</sup>  | 0.57±0.04 <sup>a</sup>  | 0.41±0.04 <sup>b</sup>  | 0.25±0.01 <sup>c</sup>  |
| 2,2,4,6,6-pentamethylheptane | 105-57-7   | 901.6  | 250.055 | 0.99546 | 0.08±0.01 <sup>a</sup>  | 0.04±0.00 <sup>d</sup>  | 0.05±0.00 <sup>c</sup>  | 0.05±0.00 <sup>c</sup>  | 0.07±0.00 <sup>b</sup>  |
| Diethyl acetal               | 13475-82-6 | 951.8  | 293.269 | 1.37348 | 1.03±0.04 <sup>a</sup>  | 0.22±0.02 <sup>b</sup>  | 0.18±0.02 <sup>b</sup>  | 0.15±0.05 <sup>b</sup>  | 0.22±0.03 <sup>b</sup>  |
| 2-Ethyl-5-methylpyrazine     | 13360-64-0 | 1001.4 | 340.968 | 1.20206 | 0.47±0.01 <sup>a</sup>  | 0.43±0.02 <sup>ab</sup> | 0.41±0.01 <sup>b</sup>  | 0.36±0.02 <sup>c</sup>  | 0.45±0.02 <sup>a</sup>  |

**Table S2** (continued )

| Volatile Compounds            | CAS        | RI     | RT       | DT      | Comparative content (%) |                         |                        |                        |                         |
|-------------------------------|------------|--------|----------|---------|-------------------------|-------------------------|------------------------|------------------------|-------------------------|
|                               |            |        |          |         | CK                      | APYA                    | APYB                   | APYC                   | APYD                    |
| 2-Methoxy-3-methylpyrazine    | 63450-30-6 | 976.4  | 314.49   | 1.54699 | 0.01±0.00 <sup>c</sup>  | 0.04±0.00 <sup>b</sup>  | 0.05±0.00 <sup>a</sup> | 0.04±0.00 <sup>b</sup> | 0.04±0.00 <sup>b</sup>  |
| 2-Acetylpyrazine              | 22047-25-2 | 1019.1 | 374.062  | 1.13076 | 0.41±0.03 <sup>b</sup>  | 1.62±0.09 <sup>a</sup>  | 1.87±0.05 <sup>a</sup> | 1.96±0.38 <sup>a</sup> | 1.68±0.15 <sup>a</sup>  |
| 2-Ethylpyrazine               | 13925-00-3 | 946.4  | 288.61   | 1.52029 | 0.01±0.00 <sup>d</sup>  | 0.05±0.00 <sup>c</sup>  | 0.15±0.00 <sup>a</sup> | 0.14±0.01 <sup>b</sup> | 0.05±0.00 <sup>c</sup>  |
| 2-Ethyl-6-methylpyrazine      | 13925-03-6 | 997.1  | 332.873  | 1.19597 | 0.35±0.00 <sup>c</sup>  | 0.52±0.01 <sup>ab</sup> | 0.53±0.00 <sup>a</sup> | 0.50±0.02 <sup>b</sup> | 0.50±0.01 <sup>ab</sup> |
| N-Nitrosodibutylamine         | 924-16-3   | 1703.1 | 1649.527 | 1.41582 | 0.42±0.02 <sup>d</sup>  | 0.67±0.02 <sup>c</sup>  | 0.92±0.02 <sup>b</sup> | 0.86±0.02 <sup>b</sup> | 1.29±0.06 <sup>a</sup>  |
| 3-Ethyl-pyridine              | 536-78-7   | 1382.1 | 1050.893 | 1.11275 | 0.45±0.02 <sup>a</sup>  | 0.20±0.00 <sup>b</sup>  | 0.09±0.01 <sup>c</sup> | 0.10±0.00 <sup>c</sup> | 0.10±0.01 <sup>c</sup>  |
| Benzothiazole                 | 95-16-9    | 1216.1 | 741.35   | 1.1773  | 0.22±0.01 <sup>d</sup>  | 0.32±0.01 <sup>b</sup>  | 0.35±0.01 <sup>a</sup> | 0.27±0.01 <sup>c</sup> | 0.28±0.01 <sup>c</sup>  |
| Pyridine                      | 110-86-1   | 1157.1 | 631.28   | 1.24446 | 2.00±0.03 <sup>a</sup>  | 0.92±0.00 <sup>b</sup>  | 0.86±0.00 <sup>c</sup> | 0.80±0.02 <sup>d</sup> | 0.92±0.02 <sup>b</sup>  |
| 2,4,5-Trimethylthiazole       | 13623-11-5 | 997.7  | 334.148  | 1.55844 | 0.06±0.00 <sup>c</sup>  | 0.04±0.00 <sup>d</sup>  | 0.04±0.00 <sup>d</sup> | 0.17±0.03 <sup>b</sup> | 0.29±0.02 <sup>a</sup>  |
| 2-Ethylfuran                  | 3208-16-0  | 947.9  | 289.942  | 1.27987 | 0.04±0.01 <sup>c</sup>  | 0.30±0.01 <sup>a</sup>  | 0.29±0.01 <sup>a</sup> | 0.30±0.01 <sup>a</sup> | 0.21±0.01 <sup>b</sup>  |
| 5,6,7,8-tetrahydroquinoxaline | 34413-35-9 | 1275   | 851.229  | 1.20521 | 0.45±0.01 <sup>b</sup>  | 0.52±0.02 <sup>a</sup>  | 0.45±0.02 <sup>b</sup> | 0.47±0.01 <sup>b</sup> | 0.47±0.01 <sup>b</sup>  |
| Isoquinoline                  | 119-65-3   | 1289.5 | 878.204  | 1.20383 | 0.57±0.00 <sup>b</sup>  | 0.61±0.03 <sup>b</sup>  | 0.81±0.02 <sup>a</sup> | 0.82±0.02 <sup>a</sup> | 0.82±0.00 <sup>a</sup>  |
| 2-Pentyl furan                | 3777-69-3  | 977.9  | 315.821  | 1.23409 | 0.06±0.01 <sup>c</sup>  | 0.14±0.01 <sup>a</sup>  | 0.14±0.00 <sup>a</sup> | 0.12±0.00 <sup>b</sup> | 0.13±0.01 <sup>ab</sup> |
| 4-Methyl-5-vinylthiazole      | 1759-28-0  | 1042.7 | 418.077  | 1.13109 | 0.62±0.01 <sup>d</sup>  | 2.00±0.06 <sup>c</sup>  | 2.28±0.08 <sup>b</sup> | 2.46±0.07 <sup>a</sup> | 2.24±0.06 <sup>b</sup>  |
| 3-Butenenitrile               | 109-75-1   | 1195.9 | 703.697  | 1.13528 | 1.53±0.15 <sup>c</sup>  | 4.32±0.26 <sup>b</sup>  | 5.07±0.07 <sup>a</sup> | 5.12±0.06 <sup>a</sup> | 4.68±0.02 <sup>b</sup>  |

\* Notes: MW—molecular mass; RI—retention index; Rt—retention time; Dt—drift time. Dimers formed in the IMS drift tube were represented by symbol -D ; Monomers were represented by symbol -M; Different letters in the same row indicated significant differences (p <0.05)
